# Supplementary material for: Cytokine profiles of plasma extracellular vesicles as progression biomarkers in Parkinson’s disease
Source: publisher site journal article supplement (doi:10.18632/aging.204575), 2023-03-09
Supplement: Supplementary file [file aging-v15i5-204575-supplementary-material-SD1.pdf]

## SUPPLEMENTARY TABLES

**Supplementary Table 1. Association between the baseline plasma EV cytokines with the change of clinical severity in people with Parkinson's disease with the adjustment of age, sex and disease duration, presented as standardized B and p value.**

|               | UPDRSII       | UPDRSIII      | Tremor               | AR            | PIGD                 | MMSE                  | MoCA                  |
|---------------|---------------|---------------|----------------------|---------------|----------------------|-----------------------|-----------------------|
| IL-1 $\beta$  | 0.160 (0.125) | 0.178 (0.089) | <b>0.220 (0.033)</b> | 0.051 (0.634) | <b>0.337 (0.001)</b> | <b>-0.288 (0.003)</b> | <b>-0.276 (0.005)</b> |
| TNF- $\alpha$ | 0.137 (0.198) | 0.174 (0.102) | <b>0.247 (0.018)</b> | 0.049 (0.653) | <b>0.302 (0.003)</b> | <b>-0.235 (0.019)</b> | <b>-0.252 (0.011)</b> |
| IL-6          | 0.164 (0.120) | 0.170 (0.107) | <b>0.213 (0.041)</b> | 0.056 (0.603) | <b>0.306 (0.002)</b> | <b>-0.256 (0.010)</b> | <b>-0.242 (0.014)</b> |
| IL-10         | 0.139 (0.193) | 0.163 (0.125) | 0.160 (0.130)        | 0.048 (0.660) | <b>0.334 (0.001)</b> | <b>-0.231 (0.021)</b> | <b>-0.210 (0.036)</b> |
| TGF- $\beta$  | 0.027 (0.802) | 0.026 (0.812) | -0.020 (0.850)       | 0.028 (0.796) | 0.007 (0.946)        | -0.024 (0.812)        | 0.080 (0.431)         |

Abbreviations: UPDRS: unified Parkinson Disease rating scale; AR: akinetic rigidity; PIGD: postural instability and gait disturbance; MMSE: mini-mental status examination; MoCA: Montreal cognitive assessment.

**Supplementary Table 2. The progression of clinical severity in people with Parkinson's disease with and without elevated baseline plasma extracellular vesicle (EV) interleukin (IL)-1 $\beta$ , IL-6 or both.**

| Plasma EV |           | IL-1 $\beta$     |                   |              |                  | IL-6             |                   |              |                  | Both IL-1 $\beta$ &IL-6 |                   |              |                  |
|-----------|-----------|------------------|-------------------|--------------|------------------|------------------|-------------------|--------------|------------------|-------------------------|-------------------|--------------|------------------|
|           |           | L, n = 66        | H, n = 35         | p-value      | p for trend      | L, n = 66        | H, n = 35         | p-value      | p for trend      | L, n = 72               | H, n = 29         | p-value      | p for trend      |
| UPDRS-II  | Baseline  | 8.09 $\pm$ 4.77  | 9.23 $\pm$ 6.88   | 0.332        | <b>&lt;0.001</b> | 8.09 $\pm$ 4.90  | 9.23 $\pm$ 6.70   | 0.332        | <b>&lt;0.001</b> | 8.33 $\pm$ 4.91         | 8.86 $\pm$ 7.06   | 0.669        | <b>&lt;0.001</b> |
|           | Follow-up | 10.36 $\pm$ 5.41 | 12.43 $\pm$ 7.92  | 0.183        |                  | 10.88 $\pm$ 5.40 | 11.97 $\pm$ 8.03  | 0.418        |                  | 10.94 $\pm$ 5.31        | 12.03 $\pm$ 8.58  | 0.442        |                  |
| UPDRS-III | Baseline  | 22.65 $\pm$ 8.20 | 23.06 $\pm$ 11.21 | 0.836        | 0.162            | 22.80 $\pm$ 8.12 | 22.77 $\pm$ 11.32 | 0.987        | 0.067            | 22.79 $\pm$ 8.00        | 22.79 $\pm$ 12.10 | 0.999        | 0.125            |
|           | Follow-up | 20.21 $\pm$ 7.63 | 23.17 $\pm$ 11.91 | 0.132        |                  | 21.23 $\pm$ 8.19 | 21.26 $\pm$ 11.45 | 0.988        |                  | 20.97 $\pm$ 8.12        | 21.90 $\pm$ 12.12 | 0.657        |                  |
| Tremor    | Baseline  | 0.38 $\pm$ 0.39  | 0.34 $\pm$ 0.27   | 0.518        | 0.124            | 0.39 $\pm$ 0.39  | 0.32 $\pm$ 0.29   | 0.327        | 0.124            | 0.38 $\pm$ 0.38         | 0.33 $\pm$ 0.28   | 0.520        | 0.200            |
|           | Follow-up | 0.27 $\pm$ 0.29  | 0.32 $\pm$ 0.24   | 0.387        |                  | 0.28 $\pm$ 0.30  | 0.31 $\pm$ 0.22   | 0.664        |                  | 0.27 $\pm$ 0.29         | 0.33 $\pm$ 0.23   | 0.351        |                  |
| AR        | Baseline  | 1.06 $\pm$ 0.42  | 1.06 $\pm$ 0.52   | 0.970        | 0.209            | 1.07 $\pm$ 0.42  | 1.04 $\pm$ 0.52   | 0.769        | 0.079            | 1.07 $\pm$ 0.41         | 1.04 $\pm$ 0.56   | 0.732        | 0.132            |
|           | Follow-up | 0.97 $\pm$ 0.38  | 1.16 $\pm$ 0.57   | 0.335        |                  | 1.02 $\pm$ 0.41  | 0.95 $\pm$ 0.52   | 0.483        |                  | 1.00 $\pm$ 0.41         | 0.98 $\pm$ 0.55   | 0.766        |                  |
| PIGD      | Baseline  | 0.71 $\pm$ 0.41  | 0.89 $\pm$ 0.77   | 0.128        | 0.104            | 0.70 $\pm$ 0.40  | 0.91 $\pm$ 0.78   | 0.071        | 0.175            | 0.70 $\pm$ 0.40         | 0.91 $\pm$ 0.84   | 0.118        | 0.123            |
|           | Follow-up | 0.72 $\pm$ 0.48  | 1.05 $\pm$ 0.87   | <b>0.016</b> |                  | 0.74 $\pm$ 0.48  | 1.01 $\pm$ 0.88   | <b>0.046</b> |                  | 0.75 $\pm$ 0.47         | 1.05 $\pm$ 0.94   | <b>0.035</b> |                  |
| MMSE      | Baseline  | 26.03 $\pm$ 3.54 | 23.86 $\pm$ 4.86  | <b>0.012</b> | 0.382            | 25.74 $\pm$ 3.71 | 24.40 $\pm$ 4.81  | 0.123        | 0.482            | 25.63 $\pm$ 3.91        | 24.41 $\pm$ 4.67  | 0.186        | 0.401            |
|           | Follow-up | 25.62 $\pm$ 5.39 | 23.46 $\pm$ 5.83  | 0.065        |                  | 25.15 $\pm$ 5.62 | 24.34 $\pm$ 5.64  | 0.494        |                  | 25.22 $\pm$ 5.50        | 24.00 $\pm$ 5.91  | 0.325        |                  |
| MoCA      | Baseline  | 21.72 $\pm$ 4.85 | 19.06 $\pm$ 6.78  | <b>0.025</b> | 0.794            | 21.14 $\pm$ 5.23 | 20.14 $\pm$ 6.46  | 0.409        | 0.848            | 21.10 $\pm$ 5.23        | 20.03 $\pm$ 6.79  | 0.401        | 0.918            |
|           | Follow-up | 21.95 $\pm$ 5.47 | 18.63 $\pm$ 7.59  | <b>0.013</b> |                  | 20.97 $\pm$ 6.35 | 20.45 $\pm$ 6.71  | 0.707        |                  | 21.15 $\pm$ 6.22        | 19.90 $\pm$ 7.02  | 0.379        |                  |

Abbreviations: UPDRS: unified Parkinson Disease rating scale; AR: akinetic rigidity; PIGD: postural instability and gait disturbance; MMSE: mini-mental status examination; MoCA: Montreal cognitive assessment.
